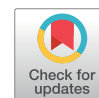

# Erratum

## **Erratum. Maternal BMI and Glycemia Impact the Fetal Metabolome. Diabetes Care 2017;40:902–910**

<https://doi.org/10.2337/dc18-er03b>

In the article cited above, the authors have requested that three sentences be corrected:

1. In the RESEARCH DESIGN AND METHODS section of the abstract, the sentence was corrected to read: “Targeted metabolic assays were performed on cord blood plasma samples from European ancestry, Afro-Caribbean, Thai, and Mexican American newborns (400 from each ancestry group) whose mothers participated in the Hyperglycemia and Adverse Pregnancy Outcome (HAPO) Study and who had anthropometric measurements at birth.”
2. In the first sentence in the third paragraph under the headings RESEARCH DESIGN AND METHODS, DATA AND SAMPLE COLLECTION, the sentence was corrected to read: “Metabolic profiling was performed on a total of 1,600 cord plasma samples from offspring of Afro-Caribbean, Mexican American, Northern European, and Thai ancestry (400 from each ancestry group) as well as 1,600 maternal fasting samples.”
3. The first sentence under the heading CONVENTIONAL METABOLITES AND TARGETED METABOLOMICS ASSAYS in the RESEARCH DESIGN AND METHODS section was corrected to read: “Conventional clinical metabolite and targeted metabolomics assays on maternal fasting serum and cord blood plasma samples were conducted at the Duke Molecular Physiology Institute Metabolomics Laboratory as previously described (7,12).”

The online version (<https://doi.org/10.2337/dc16-2452>) reflects these changes.

*William L. Lowe Jr., James R. Bain,  
Michael Nodzenski, Anna C. Reisetter,  
Michael J. Muehlbauer, Robert D. Stevens,  
Olga R. Ilkayeva, Lynn P. Lowe,  
Boyd E. Metzger, Christopher B. Newgard,  
and Denise M. Scholtens, for the HAPO  
Study Cooperative Research Group*
